1 **Facilitating the Virtual Exercise Games for Youth with T1D (ExerT1D) Peer Intervention: Protocol**  
2 **Development and Feasibility**

3  
4 Garrett I. Ash<sup>1,2</sup>, Soohyun Nam<sup>3</sup>, Matthew Stults-Kolehmainen<sup>4,5</sup>, Adrian D. Haughton<sup>1,6</sup>, Carolyn  
5 Turek<sup>7</sup>, Annette Chmielewski<sup>1</sup>, Michael Shelver<sup>1</sup>, Julien S. Baker<sup>8</sup>, Stuart A. Weinzimer<sup>3,9</sup>, Laura M.  
6 Nally<sup>9</sup>

7  
8  
9 <sup>1</sup>Department of Internal Medicine, Yale School of Medicine, New Haven, CT, United States

10 <sup>2</sup>Center for Pain, Research, Informatics, Medical Comorbidities and Education Center (PRIME), VA  
11 Connecticut Healthcare System, West Haven, CT, United States

12 <sup>3</sup>Yale School of Nursing, Orange, CT, United States

13 <sup>4</sup>Center for Weight Management, Yale New Haven Hospital, North Haven, CT, United States

14 <sup>5</sup>Department of Biobehavioral Sciences, Teachers College – Columbia University, New York, NY,  
15 United States

16 <sup>6</sup>Department of Health and Movement Sciences Programs, Southern Connecticut State University, New  
17 Haven, CT, United States

18 <sup>7</sup>Child Study Center, Yale School of Medicine, New Haven, CT, United States

19 <sup>8</sup>Centre for Health and Exercise Science Research, Population Health and Medical Informatics, Hong  
20 Kong Baptist University, Kowloon Tong, Hong Kong SAR, China.

21 <sup>9</sup>Department of Pediatrics, Yale School of Medicine, New Haven, CT, United States

22  
23  
24 **Correspondence:**

25 Garrett I. Ash, PhD

26 Yale School of Medicine, Section of General Internal Medicine

27 Building 35A

28 950 Campbell Avenue

29 West Haven, CT 06516

30 Phone: 203-444-3079

31 Fax: 203-937-3829

32 Email: garrett.ash@yale.edu

33

## ABSTRACT

### Background

Barriers to moderate-to-vigorous physical activity (MVPA) for adolescents with type 1 diabetes (T1D) include physiology, transition to autonomy, and diabetes-specific stigma. Opportunities for T1D peer activities with T1D role model support are limited. To address this need, our single-arm pilot study tested the Home-based Virtual Activity Program for Youth with T1D (HAP-V-T1D) for feasibility.

### Methods

Participants (n=15) were mean age 15.6 [SD 1.5] years, 7 non-Hispanic white, 6 female, 2 non-binary, mean A1c 8.9%±2.2%. The program included an MVPA videogame, physician-led education regarding managing T1D around MVPA, objective habitual MVPA goal-setting, and T1D management skills guided by young adult instructors living with T1D.

### Results

For feasibility, 13/15 participants attended 10/12 sessions. Participants' perceptions of the program, comfort, instructors, and group cohesion were rated high/very high (4.2±0.5 to 4.8±0.3 out of 5). Motivation for the videogame was also high (4.1±0.4 out of 5). Instructor-adolescent interactions related to building T1D management skills were rated as excellent for 78% of sessions. Similarly, sharing knowledge and experiences were rated as excellent for 68% of sessions. However, adolescent-adolescent interactions were poor (communication 29% excellent, peer interactions 8% excellent). The most reported barriers to participation were negative mood and oversleeping. No participants experienced diabetic ketoacidosis, severe hypoglycemia, or injuries during the study period. Compared to baseline, glycemic metrics appeared to decrease during and post intervention (d= -0.72, -1.12).

### Conclusion

HAP-V-T1D facilitated unprecedented T1D peer support achievements by engaging diverse youth with T1D in an MVPA program led by T1D role models. Larger studies are needed to assess if this intervention can improve glycemic measures and reduce diabetes-specific stigma.

**Abstract**                      **word**                      **count:**                      264                      (limit                      300)

27

## INTRODUCTION

28

29

30

31

32

33

34

The adolescent years present unique challenges to youth with type 1 diabetes (T1D). While it is estimated that only 20% of youth meet the recommended A1c level below 7%, it is well-known that intensive management of T1D is necessary for long-term health.<sup>1,2</sup> Interventions aimed at improving health outcomes need to be introduced during the transition period of adolescence when youth are developing the skills they will need as adults to manage T1D. Navigating this transitional time presents challenges for adolescents with diabetes, creating a vital need for interventions to address T1D self-management support for adolescents.

35

36

37

38

39

40

41

42

43

44

45

46

47

48

49

50

51

52

Moderate-to-vigorous intensity physical activity is an essential complement to insulin therapy in T1D that has been demonstrated to improve overall physical (body composition, muscle strength, and cardiopulmonary fitness) and mental health, as well as diabetes-specific risks, including improving glycemic management, reducing insulin resistance, and potentially attenuating risk of long-term cardiovascular complications.<sup>3</sup> Yet, MVPA is largely unaddressed by T1D support interventions for individuals with T1D at any age. Predicting an individual's glycemic response to MVPA is incredibly complex and requires more frequent glucose monitoring with subsequent adjustments to diet and insulin dosing. Further, managing MVPA can be especially challenging due to puberty-specific physiologic factors like increased insulin resistance.<sup>3-6</sup> Moreover, for adolescents with T1D, glycemic variability encountered during MVPA may impede adopting healthy, active behaviors. Barriers to physical activity reported by adolescents include the psychological fear of glycemic destabilization<sup>7</sup> and social stigma associated with disclosing an individual's diabetes diagnosis when engaging in MVPA. Apart from psychosocial factors, adolescents report that the logistical complications of glycemic dysregulation also impede their MVPA (e.g., needing to interrupt for carbohydrate supplementation).<sup>7</sup> Adolescents also report teachers and coaches have limited T1D knowledge<sup>8</sup> and their parents discourage MVPA.<sup>7</sup> It is therefore no surprise that adolescents with T1D engage in less MVPA than the general adolescent population,<sup>9</sup> of which less than 10% meets the MVPA recommendations of the Centers for Disease Control and Prevention (60min per day).<sup>10</sup> Thus, it is warranted to pursue

53 multifaceted interventions targeted at addressing these barriers.

54 Current pediatric T1D MVPA guidelines detail the basic factors to consider during MVPA, but  
55 most providers do not actively prescribe them<sup>11</sup> and there is a striking lack of data regarding feasibility,  
56 acceptability, safety, and efficacy of protocols supporting their implementation for those with low  
57 baseline MVPA.<sup>3</sup> Active videogames, defined as videogames that are controlled by gross motor body  
58 movements, have been leveraged as an alternative strategy to promote MVPA among youth,<sup>12</sup> aligned  
59 with new consensus guidelines that screen time should be tailored to achieve health benefits rather  
60 than minimized.<sup>13</sup> Group activities incorporating active videogame technology with T1D mentors would  
61 provide an exciting new avenue to deliver all the components of a successful T1D self-management  
62 intervention:<sup>14</sup> 1) behavior modification (goal setting, self-monitoring); 2) psychosocial support  
63 (interactions with T1D peers and role models); and 3) medical guidance (MVPA safety monitoring and  
64 advice). The purpose of the present study was to deliver a 6-week alpha version of a virtual home  
65 intervention to promote MVPA among adolescents with T1D, evaluate its feasibility, acceptability,  
66 safety, and describe its final curriculum for purposes of a future larger study. We hypothesized that  
67 metrics of feasibility and acceptability would meet our set criteria for warranting a future definitive trial.

68

69

## METHODS

### Overview

71 We present a single-arm prospective feasibility study of youth with T1D who underwent a 6-week  
72 intervention aimed at promoting MVPA. The study was approved by the Institutional Review Board  
73 (Yale-HIC#2000030105) in accordance with the Declaration of Helsinki and registered on  
74 clinicaltrials.gov (NCT05163912).

### Participants and Enrollment

76 Participants were eligible if they were between the ages of 14 and 19 years (inclusive), had diagnosis  
77 of T1D for at least 6 months, were not achieving recommended physical activity targets (i.e.,  
78 <4days/wk with 60+min MVPA according to self-report at baseline), already wearing or willing to wear

79 a continuous glucose monitor (CGM) for the duration of the study, and did not have medical  
80 conditions that would preclude participation in group MVPA (cerebral palsy, current pregnancy, or  
81 others at investigator's discretion).

82 Participants were recruited from the Yale Children's Diabetes Center, [clinicaltrials.gov](https://clinicaltrials.gov), and  
83 diabetes social media groups (Facebook) between December 23, 2021 and June 15, 2022. In  
84 addition, recruitment materials were distributed publicly in collaboration with Children with Diabetes  
85 (T1-Today, Inc., Columbus, OH), a non-profit dedicated to providing education and support to families  
86 living with T1D.

87 First, potential participants completed a telephone screening to see if they met inclusion  
88 criteria for the study. The screening included questions about current MVPA by the Prochaska  
89 Physical Activity Assessment Question (specificity 61%-80%, test-retest ICC=0.6-0.8),<sup>15</sup> as well as the  
90 Physical Activity Readiness Questionnaire.<sup>16</sup> For any health conditions presenting special  
91 considerations for physical activity, additional documentation was requested from the primary care  
92 physician or sub-specialist for MVPA clearance. Each qualifying participant and one parent completed  
93 an electronic informed permission/assent and consent process prior to any study-related activities.  
94 Following consent/assent, two additional descriptive surveys were completed by the participant  
95 (recreational screen time,<sup>17</sup> pubertal development status<sup>18</sup>) and a demographics form was completed  
96 by the parent. The research team shipped supplies to the participant and held a 1.5-hour HIPAA  
97 compliant Zoom (Zoom Video Communications, San Jose, CA) tele-video call to guide setup.

#### 98 **Equipment setup**

99 Participants fitted their home television monitor with a Nintendo Switch Entertainment System  
100 (Nintendo of America, Inc., Redmond, WA) including Ring Fit Adventure cartridge and equipment.  
101 Ring Fit Adventure alternates low- (stationary walking or jogging) with higher-intensity exercises that  
102 are dynamic (e.g., knee-lifts) or resistance-based (e.g., overhead press, squat, abdominal press). The  
103 game uses a leg-strap accelerometer and handheld ring with gyroscopic/accelerometer sensors to  
104 measure distance covered and successful repetitions of each exercise. Success with exercises leads

105 to unlocking of more advanced adaptations (e.g., abdominal press upgraded to Russian twist). It has  
106 been previously demonstrated to stimulate activity intensity reaching the MVPA threshold among  
107 children.<sup>19</sup> Participants were also provided with a metal tripod and Bluetooth headphones, so they  
108 could position their smartphone to capture the game screen while communicating over Zoom during  
109 the group MVPA. They were also provided a yoga mat, poster with Borg 6-20 rating of perceived  
110 exertion scale, Precision Xtra Blood Ketone meter and strips (Abbott Diabetes Care, Alameda, CA),  
111 and Fitbit Inspire 2 (San Francisco, CA) to track goals for weekly steps and MVPA heart rate. Fitbit  
112 accuracy studies have yielded variable results but a systematic review with quantitative synthesis  
113 reported the majority found overestimation of steps (~5%) and underestimation of heart rate (~3%).<sup>20</sup>

#### 114 **Intervention**

115 The intervention was based upon Social Cognitive Theory which predicts that an individual  
116 health behavior such as MVPA is influenced by individual experiences, environmental factors, and the  
117 actions of others.<sup>21</sup> We therefore integrated peer and role model interactions into home-based MVPA:  
118 livestreamed active videogame sessions and tele-video discussions about experiences self-monitoring  
119 MVPA and glucose.

120 We involved three role models ages 20-39yr living with T1D and participating in nationally  
121 visible athletics, amateur athletics, and a non-performance-based physically active lifestyle  
122 respectively. Additionally, two of them were nationally visible advocates for T1D and the third was a  
123 certified diabetes care and education specialist. They agreed to work in a rotation to attend classes.  
124 The sessions were also monitored by a board-certified pediatric endocrinologist living with T1D and an  
125 exercise physiologist. Each of these two monitors attended all but two classes respectively, for which  
126 they designed the lesson plan and remained available by phone in the event of clinical concerns.  
127 Planning discussions and two pilot sessions were held with input from the above leaders, a pediatric  
128 exercise physiologist, an exercise telemedicine clinician, a pediatric psychologist seeing patients with  
129 T1D, and senior diabetes investigators in behavioral science and technology respectively.

130 Participants were recruited in 4 sequential cohorts for a 6-week intervention with meetings every

131 Saturday and Wednesday (Table 1) over HIPAA compliant Zoom tele-video. Sessions began with an  
132 icebreaker question that was either T1D-related (e.g., “what is your favorite low blood sugar  
133 treatment?”) or not (e.g., “if you could bring one thing with you on a deserted island, what would it  
134 be?”). At the first session in each cohort, the pediatric endocrinologist gave an overview of safe  
135 exercise practices related to T1D management based on national and international guidelines current  
136 at the time of the study.<sup>4,5,22</sup> At each session, before and after exercise teens reported verbally or  
137 through the Zoom chat function to the clinician their sensor glucose value and trend arrow, insulin  
138 dosing (last bolus and/or insulin-on-board), and results of a ketone test if sensor glucose exceeded  
139 250mg/dL (13.9 mmol/L). The clinician then provided recommendations for exercise based on  
140 published guidelines.<sup>4,5,22</sup> Clinical guidance was given when ketones were present ( $\geq 0.6$ mmol/L). For  
141 safety, the instructors also confirmed that the participants had fast-acting carbohydrates accessible  
142 (e.g., orange juice, glucose tablets), proper exercise shoes and clothing, and an 8'-by-8' unobstructed  
143 space for exercise. On a weekly basis, the endocrinologist reviewed data from CGM, ketone tests, and  
144 clinical events, identified any safety concerns related to exercise, and communicated these concerns to  
145 the participants and their parents.

146 The segment devoted to exercise was 32min the first Saturday, 40min subsequent Saturdays,  
147 and 20min on Wednesdays. Participants were required to remain “present” for the full session, with  
148 either their image or the television display of their avatar reflecting their exercise in Zoom camera view  
149 (Figure 1). They communicated to the instructor if they needed to leave the session for any reason. For  
150 the purposes of coaching exercise, we tracked the proportion of each session spent in active  
151 movement, repetitions of each exercise, Borg 6-20 rating of perceived exertion of each exercise, and  
152 average Fitbit heart rate.

153 The remaining 20-30min of each session was spent on discussion activities over Zoom. Week 1  
154 sessions were dedicated to creating exercise goals. Instructors and participants discussed and agreed  
155 upon individual fitness-related goals. Goal-setting followed the SMART principle (Specific, Measurable,  
156 Attainable, Relevant, Timely). In addition, participants in each cohort formulated a group goal of

157 cumulative achievements (e.g., group steps) to promote a cooperative rather than competitive  
158 approach.<sup>23</sup> Goal progress was checked and discussed each week, including the provision of MVPA  
159 and T1D management information that helped support the specific goals. At the week 6 sessions, the  
160 instructors led a discussion about the relevance of the intervention's MVPA to building and sustaining  
161 an overall active lifestyle.

162 At the week 2-5 sessions, instructors engaged teens to create role-playing skits that involved  
163 educational points related to T1D management. Skit planning and acting occurred through verbal  
164 dialogue on Zoom. It included choosing a plot based on suggestions from instructors and the teens,  
165 developing a list of roles, choosing and assigning roles, developing a script with a combination of set  
166 and improvised lines, and acting. The instructors and endocrinologist guided the planning so that the  
167 skit integrated educational points about T1D.

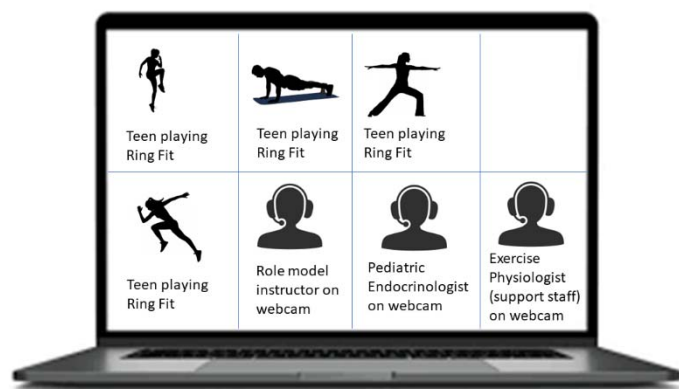

168  
169  
170  
171  
172

**Figure 1.** Virtual exercise session livestreamed over Zoom.



173

**Table 1.** Structure of intervention sessions.

| Component                                                                                                                                                                                                                                                                                                                             | Saturdays Time of Day <sup>1</sup> | Wednesdays Time of Day   |
|---------------------------------------------------------------------------------------------------------------------------------------------------------------------------------------------------------------------------------------------------------------------------------------------------------------------------------------|------------------------------------|--------------------------|
| Icebreaker question                                                                                                                                                                                                                                                                                                                   | 10:00-10:05                        | 19:00-19:05              |
| Sensor glucose check and guidance <sup>2</sup>                                                                                                                                                                                                                                                                                        | 10:05-10:20                        | 19:05-19:20 <sup>3</sup> |
| Exercise                                                                                                                                                                                                                                                                                                                              | 10:20-11:00                        | 19:20-19:40 <sup>3</sup> |
| Sensor glucose check and guidance                                                                                                                                                                                                                                                                                                     | 11:00-11:05                        | 19:40-19:45 <sup>3</sup> |
| Discussion Activities                                                                                                                                                                                                                                                                                                                 | 11:05-11:30                        | 19:45-20:00              |
| <ul style="list-style-type: none"> <li>MVPA goals (<b>week 1</b>: set goals; <b>weeks 2-5</b>: check progress and provide MVPA and T1D management information supporting goals; <b>week 6</b>: reflection on relationship to overall active lifestyle)</li> <li>Role-playing skits (<b>weeks 2-5</b>: planning and acting)</li> </ul> |                                    |                          |

<sup>1</sup>USA eastern time zone, which was the local time of all participants except 1 who was USA mountain time zone (2 hours earlier)

<sup>2</sup>Extended to 30 minutes at first session to give general overview of guidelines. This session had reduced exercise by 8 minutes and discussion activities by 5-10 minutes.

<sup>3</sup>Cohort #1 only had these components on Saturdays (i.e., Wednesday session only met 19:00-19:20). Added these components to Wednesdays per expressed interest of cohort #2.

174  
175

176 **Assessments**

177 Fidelity

178 Session recordings were double-coded by two exercise physiologists (one not involved with  
179 intervention). They identified missed opportunities for practicing each core competency of a role model  
180 and peer intervention:<sup>24-28</sup> building skills, sharing knowledge and experiences, enriching  
181 communication, and facilitating peer interactions. Each competency was then coded as “excellent”  
182 (competency evident with 0 missed opportunities), “fair” (competency evident with ≥1 missed  
183 opportunities), or “poor” (competency not evident). The identified missed opportunities were discussed  
184 with instructors at weekly meetings as areas to iteratively improve the intervention. To generate rich  
185 discussion, each missed opportunity identified by either rater was included provided agreement by the  
186 other rater.

187 Follow-Up Retrospective Survey of Acceptability

188 The Motivation for Exergame Play Inventory<sup>29</sup> in our sample had adequate reliability for the full scale  
189 ( $\alpha=0.79$ , 22 items) and the sensory immersion/flow subscale ( $\alpha=0.79$ , 8 items). The other subscales are  
190 typically considered too short to establish meaningful reliability (3-4 items) but nonetheless reported.<sup>29</sup>

191 The perceived cohesion scale had adequate reliability for the morale (e.g., “I am happy to be  
192 part of this group”) ( $\alpha=0.78$ ) and belonging subscales (e.g., “I see myself as part of this group”)  
193 ( $\alpha=0.83$ ).<sup>30</sup>

194 We also issued a satisfaction survey taken from our past work<sup>25</sup> for participants to evaluate  
195 program components/strategies (5 items,  $\alpha=0.72$ ), personal comfort level (6 items,  $\alpha=0.81$ ), and  
196 interactions with instructors (12 items,  $\alpha=0.95$ ). Participants also rated their top-3 of these factors by  
197 order of importance.

198 Finally, participants and leaders each completed a semi-structured satisfaction interview which  
199 will be reported separately. Leaders consented verbally after reviewing an information sheet.

## 200 **Ancillary Analysis of Glycemic Outcomes**

201 HbA1c was unlikely to change during the short timeframe of the intervention. To explore  
202 probable magnitude of glycemic effects to inform future trials, we calculated the glucose management  
203 indicator (GMI) for each 14-day block of the 6-week intervention. GMI uses CGM to project HbA1c  
204 using an equation from cohort data.<sup>31</sup> We also estimated maintenance of glycemic effects using follow-  
205 up HbA1c values 39 (SD=15) weeks later, collected at screening for an addendum study (September 1,  
206 2022 through September 19, 2023).

## 207 **Data Analysis**

208 Criteria for warranting a future definitive trial were recruitment uptake ( $\geq 35\%$ ),<sup>32</sup> attendance ( $\geq 75\%$   
209 attending  $\geq 75\%$  of sessions),<sup>33</sup> biosensor wear-time ( $\geq 70\%$ ),<sup>34</sup> survey completion ( $\geq 85\%$ ), fidelity ratings  
210 ( $\geq 70\%$  excellent,  $\geq 90\%$  at least fair), and psychosocial perceptions of acceptability ( $\geq 3.0$  out of 5).

211 Metrics were tested for normality using the Shapiro-Wilks test, then reported by mean and standard  
212 deviation, median and interquartile range, or frequencies as appropriate. We refined the curriculum  
213 based on data after each cohort, ending the trial when no further refinements were found. Probable

214 magnitude of glycemic effect from baseline was calculated non-parametrically due to the small sample  
215 size, by calculating the Wilcoxon Signed Rank test statistic (SPSS v28, Chicago, IL) then using Fritz's  
216 formulas<sup>35</sup> to calculate biserial r and convert to Cohen's d ( $\geq 0.20$  is small,  $\geq 0.50$  moderate,  $\geq 0.80$  large).

## 217 **RESULTS**

### 218 **Recruitment**

219 Clinic recruitment yielded 26 candidates referred from providers. Upon phone call by the study team, 5  
220 were disqualified due to exceeding the baseline physical activity criteria, 6 declined to participate (2  
221 due to lack of energy for physical activity, 2 due to time conflicts, 2 without giving a reason). The  
222 remaining 15 scheduled a consenting visit, of whom 8 withdrew prior to starting the intervention (4  
223 without giving a reason, 1 due to technical difficulties sharing CGM, 1 due to time conflicts, 1 due to  
224 illness, and 1 due to change in housing conditions). The remaining 7 enrolled. One of them required  
225 clearance for a medical condition from a specialist (arthritis).

226 Children with Diabetes posted the advertisement in three issues of their weekly newsletter  
227 (February 9<sup>th</sup>–February 23<sup>rd</sup>, 2022) as well as their Facebook page on February 15<sup>th</sup>. The Facebook  
228 post received 12 likes, 10 shares, and 23 email inquiries. After the study team replied with a full  
229 description of the study, 17 completed eligibility screening. Among them, 9 were disqualified due to  
230 exceeding the baseline MVPA criteria, and the other 8 qualified, consented, and started the  
231 intervention.

232 Thus overall, 23/43 of those screened were eligible and scheduled a consent visit, among  
233 whom 15 enrolled (35%). All 15 completed follow-up assessments.

### 234 **Demographics**

235 Eight states were represented: 8 participants from CT, and 1 each from DE, FL, GA, MD, NJ, UT, VA.  
236 Participants represented diverse demographics: 8 people of color, 6 female, 2 non-binary, 4 public  
237 insurance, 2 household income below poverty line, and 7 household income  $< \$60,000$ . Notably, most  
238 of the participants had A1c levels above American Diabetes Association targets: 12 with A1c  $> 7.0\%$   
239 ( $> 53$  mmol/mol), 5 with A1c  $> 10.0\%$  ( $> 86$  mmol/mol). Diverse participants appeared to stem from clinic

240 recruitment rather than social media (Table 2).

241

242

**Table 2.** Demographics (n=15, mean±SD).

|                                                   | Recruited from Clinic                                                                                                             | Recruited from Social Media                                                                                               | Total                                                                                                                           |
|---------------------------------------------------|-----------------------------------------------------------------------------------------------------------------------------------|---------------------------------------------------------------------------------------------------------------------------|---------------------------------------------------------------------------------------------------------------------------------|
| N                                                 | 7                                                                                                                                 | 8                                                                                                                         | 15                                                                                                                              |
| Age (yr) <sup>1</sup>                             | 15.8±1.1                                                                                                                          | 15.5±1.9                                                                                                                  | 15.6±1.5                                                                                                                        |
| Gender                                            | <b>3 female (43%)</b><br><b>2 non-binary (29%)</b><br>2 male (29%)                                                                | 3 female (38%)<br>0 non-binary (0%)<br>5 male (62%)                                                                       | 6 female (40%)<br>2 non-binary (13%)<br>7 male (47%)                                                                            |
| Pubertal Stage                                    | 0 Early (0%)<br>0 Mid (0%)<br>5 Late (71%)<br>2 Post (29%)                                                                        | 1 Early (13%)<br>3 Mid (38%)<br>3 Late (38%)<br>1 Post (13%)                                                              | 1 Early (7%)<br>3 Mid (20%)<br>8 Late (53%)<br>3 Post (20%)                                                                     |
| Race/Ethnicity                                    | <b>1 non-Hispanic black (14%)</b><br><b>4 Hispanic white or other (57%)</b><br>0 more than one race<br>2 non-Hispanic white (29%) | 2 non-Hispanic black (25%)<br>0 Hispanic white or other (0%)<br>1 more than one race (13%)<br>5 non-Hispanic white (63%)  | 3 non-Hispanic black (20%)<br>4 Hispanic white (27%)<br>1 more than one race (7%)<br>7 non-Hispanic white (47%)                 |
| A1c (%)                                           | <b>10.1±2.1</b><br>7 over 7.0% (100%)<br><b>4 over 10.0% (57%)</b>                                                                | 7.9±1.8<br>5 over 7.0% (63%)<br>1 over 10.0% (13%)                                                                        | 8.9±2.2<br>12 over 7.0% (67%)<br>5 over 10.0% (33%)                                                                             |
| A1c (mmol/mol)                                    | <b>87±34</b><br>7 over 53 (100%)<br><b>4 over 86 (57%)</b>                                                                        | 63±20<br>5 over 53 (63%)<br>1 over 86 (13%)                                                                               | 74±24<br>12 over 53 (67%)<br>5 over 86 (33%)                                                                                    |
| Duration of type 1 diabetes (yr)                  | 8.0±4.1                                                                                                                           | 8.4±3.8                                                                                                                   | 8.2±3.8                                                                                                                         |
| Household income annual                           | <b>2 &lt;\$20,000 (29%)</b><br><b>3 \$40,000-\$59,999 (43%)</b><br>1 >\$100,000 (14%)<br>1 declined to respond                    | 0 <\$20,000 (0%)<br>2 \$40,000-\$59,999 (25%)<br>3 \$80,000-\$99,999 (38%)<br>3 >\$100,000 (38%)<br>0 declined to respond | 2 <\$20,000 (13%)<br>5 \$40,000-\$59,999 (33%)<br>3 \$80,000-\$99,999 (20%)<br>4 >\$100,000 (27%)<br>1 declined to respond (7%) |
| Insurance (N public, %)                           | <b>3 (43%)</b>                                                                                                                    | 1 (13%)                                                                                                                   | 4 (27%)                                                                                                                         |
| Therapy (N pump, %)                               | 6 (86%)                                                                                                                           | 8 (100%)                                                                                                                  | 14 (94%)                                                                                                                        |
| Total daily insulin dose (U/kg)                   | 0.8±0.2                                                                                                                           | 0.9±0.3                                                                                                                   | 0.9±0.3                                                                                                                         |
| Body mass index (% <sup>3</sup> ile) <sup>1</sup> | 79.0±12.4                                                                                                                         | 55.8±35.7                                                                                                                 | 66.6±29.1                                                                                                                       |
| Physical activity (days/wk with 60+ min MVPA)     | <b>1.1±1.1</b>                                                                                                                    | 1.8±1.0                                                                                                                   | 1.5±1.1                                                                                                                         |
| Screen time (hours/day)                           | 9.3±5.2                                                                                                                           | 8.3±4.4                                                                                                                   | 8.8±4.6                                                                                                                         |

<sup>1</sup>Non-normally distributed (age right-skewed, body mass index left-skewed).  
Bolded figures indicate apparent difference from social media group.

243

244 **Intervention Feasibility**

## 245 Attendance

246 Overall, 13 participants attended 10/12 sessions. Ten participants attended 11 sessions. Three  
247 participants attended 10 sessions. Among absences by these participants, 7 were due to family  
248 activities, 1 was due to unavailability of television set or computer screen, 2 were due to school  
249 extracurricular activities, and 2 were unexplained. The remaining two participants attended 6 sessions.  
250 One of these participants reported the main cause of non-attendance was negative mood, and the  
251 other reported it was oversleeping. Finally, all 15 participants completed the follow-up survey and  
252 interview, the latter lasting 18-48min (median 20 [IQR 19,31]). All 5 staff also completed the interview  
253 (31-48min).

254 The last cohort took one week longer than expected to recruit the minimum 3 participants. In  
255 fairness to the 2 participants who signed up on the preset schedule, we offered them 2 sessions during  
256 the week of delay which were credited as extra sessions.

## 257 Technical Barriers

258 One participant had technical problems that they rated as causing a moderate or higher disruption,  
259 which included 1 day of dead controllers that took 85% of the MVPA session to recharge, and 2 days  
260 when they conversed by text chat due to phone audio interruption. In addition, 2 participants had Zoom  
261 connectivity interruptions on 1-2 occasions, which they reported caused mild disruption.

## 262 Fidelity

263 Instructor competencies were rated highest for building T1D and MVPA management skills followed by  
264 sharing T1D and MVPA knowledge and experiences, enriching communication at the group sessions,  
265 and facilitating peer interactions at the group sessions (Table 3). Most competencies trended upward  
266 for each successive cohort, except #3 to #4 where they trended downward. Cohort #4 was tied for  
267 lowest size and had lowest attendance among those enrolled. Cohorts had different instructors, but all  
268 the instructors achieved similar scores on each competency.

## 269 Intervention Acceptability

270 Participant satisfaction ratings were highest for interactions with instructors, followed by perceived

271 group cohesion, program components and strategies, comfort (Table 3), and lastly Ring Fit game  
272 motivation (Table 4). The instructor component was also most frequently selected as a top-1 or top-3  
273 important component (80%, 60%). Nonetheless, a few selections related to comfort (13%, 23%) or  
274 program structure (7%, 16%).

**Table 3.** Attendance, Fidelity, Satisfaction, and Perceived Cohesion by Group

| Cohort | Size (n) | Attendance (Mean %) | Instructor Competencies (% of sessions rated excellent) <sup>1</sup> |                                                |                                               |                                                      | Psychosocial Perceptions mean±SD (% rated ≥4 out of 5) |                            |                                   |                   |
|--------|----------|---------------------|----------------------------------------------------------------------|------------------------------------------------|-----------------------------------------------|------------------------------------------------------|--------------------------------------------------------|----------------------------|-----------------------------------|-------------------|
|        |          |                     | Building T1D and MVPA Management Skills                              | Sharing T1D and MVPA Knowledge and Experiences | Enriching Communication at the Group Sessions | Facilitating Peer Interactions at the Group Sessions | Interactions with Instructors                          | Group Cohesion (Perceived) | Program Components and Strategies | Comfort           |
| 1      | 3        | 75                  | 75                                                                   | 58                                             | 25                                            | 0                                                    | 4.6±0.7<br>(67%)                                       | 4.2±0.9<br>(67%)           | 4.1±0.2<br>(100%)                 | 3.9±0.9<br>(67%)  |
| 2      | 4        | 92                  | 100                                                                  | 90                                             | 46                                            | 27                                                   | 4.9±0.0<br>(100%)                                      | 4.6±0.4<br>(100%)          | 4.5±0.3<br>(100%)                 | 4.5±0.1<br>(100%) |
| 3      | 5        | 95                  | 100                                                                  | 100                                            | 50                                            | 0                                                    | 4.9±0.2<br>(100%)                                      | 4.2±0.4<br>(80%)           | 4.3±0.6<br>(60%)                  | 4.2±0.4<br>(80%)  |
| 4      | 3        | 72                  | 38                                                                   | 25                                             | 0                                             | 0                                                    | 4.8±0.3<br>(67%)                                       | 4.7±0.2<br>(100%)          | 4.3±0.7<br>(33%)                  | 4.3±0.6<br>(33%)  |
| Total  | 15       | 76                  | 78                                                                   | 68                                             | 29                                            | 8                                                    | 4.8±0.3<br>(93%)                                       | 4.4±0.5<br>(87%)           | 4.3±0.5<br>(73%)                  | 4.2±0.5<br>(80%)  |

<sup>1</sup>All other sessions were scored "fair" (i.e., none were scored "poor").

T1D, type 1 diabetes.

MVPA, moderate-to-vigorous physical activity.

**Table 4.** Exergaming Motivation (n=15)

| Component                     | Mean±SD (% rated ≥4 out of 5) |
|-------------------------------|-------------------------------|
| Goals of the Game             | 4.6±0.4<br>(93%)              |
| Performance Feedback          | 4.3±0.5<br>(87%)              |
| User Control                  | 4.3±0.6<br>(73%)              |
| Sensor Immersion/Flow         | 4.0±0.6<br>(53%)              |
| Game Challenge and Difficulty | 3.2±0.6<br>(13%)              |
| Total                         | 4.1±0.4<br>(60%)              |

279 **Intervention Safety and Monitoring**

280 No participants experienced diabetic ketoacidosis, severe hypoglycemia, or other study-related adverse  
281 events during the study period. One participant developed elevated ketone levels prior to exercise (1.1  
282 mmol/L), that resolved after insulin administration prior to exercise. One participant deferred exercise  
283 due to feeling unwell as a result of having a high sensor glucose level (400mg/dL, 22.2 mmol/L) without  
284 elevated ketones. No participants reported a glucose level less than 70mg/dL (3.9 mmol/L) during the  
285 sessions, although there were 3 participants who reported hypoglycemia symptoms on 1 occasion that  
286 resolved upon ingesting 10g-15g of carbohydrates. As well, CGM review indicated 3 participants had  
287 sensor glucose levels less than 70mg/dL (3.9 mmol/L) less than 1 hour after 1 of the sessions. These  
288 instances resolved without guidance from staff.

289 All participants were using a CGM in their clinical care before the study (12 Dexcom G6, 3  
290 Abbott Libre 2). Weekly CGM audits found 75.3% of the possible readings were captured across all  
291 study participants. Ten participants met the recommended  $\geq 70\%$  completeness. Primary reasons for  
292 not wearing CGM at least 70% of the time included scanning the Libre 2 sensor less frequently than its  
293 8hr memory duration (n=2), cloud syncing errors (n=1), changing the Dexcom G6 sensor less  
294 frequently than its 10-day life (n=1), and periodic psychological discomfort with being monitored (n=1).  
295 Study coordinators checked CGM wear-time twice weekly at the group sessions and addressed  
296 barriers with participants outside of each session.

297 Weekly CGM physician reviews resulted in 4 participants being referred to their providers for  
298 insulin dose adjustments to address elevated percentages of low sensor glucose values. In 3 cases the  
299 issue was resolved following adjustment by the diabetes provider, and in 1 case it was resolved  
300 following a small adjustment by the parent (change in insulin correction factor by 20%) and checking in  
301 with the teen about accurate carbohydrate counting. The physician also noted 3 instances among 3  
302 participants where sensor glucose had overnight lows after evening exercise. Trends were addressed  
303 with the participant directly. Topics related to avoiding hypoglycemia after exercise were also discussed  
304 in the group lesson.



305 Fitbit heart rates were captured for 96/117 person-sessions (82%), with 14 having at least one  
 306 session. Among them, 1 averaged in the vigorous range of 70%-90% age-predicted maximum, 12  
 307 averaged in the moderate range of 55%-70%, and 1 averaged below the moderate range. The average  
 308 participant heart rate across sessions was 61.4% (SD=5.2%) of maximum.

309 **Intervention Activities**

310 Participants set individual goals related to achieving Fitbit step counts, playing a sport, playing Ring Fit  
 311 outside of group sessions, or managing diabetes (Table 5). The success rate was 33% overall and  
 312 similar across categories. One participant declined to wear the Fitbit due to wrist joint discomfort, so  
 313 instead quantified a step goal as walking from school to home. Group goals related to sleep duration (1  
 314 group), playing Ring Fit outside of class (2 groups), and average Fitbit distance (1 group). The last two  
 315 of the four were successful.

**Table 5.** Individual Goals (n=15)

| Goal Category       | Number of participants | Specific Value                                                                                            | Achieved Goal |
|---------------------|------------------------|-----------------------------------------------------------------------------------------------------------|---------------|
| Steps               | 6                      | School to home, 3d/week<br>4000 per day<br>7000 per day<br>8500 per day<br>10000 per day<br>12500 per day | 2 / 6 (33%)   |
| Sport               | 5                      | Find a soccer group<br>Bike 26.2 miles<br>Run 8:00 mile<br>Run 6:35 mile<br>Run 7:30 pace for 5 miles     | 2 / 5 (40%)   |
| Ring Fit            | 3                      | 20 minutes per day<br>500 reps of 1 specific movement<br>Reach world 9                                    | 1 / 3 (33%)   |
| Diabetes management | 1                      | 7.0% estimated A1c from CGM                                                                               | 0 / 1 (0%)    |
| Total               | 15                     |                                                                                                           | 5 / 15 (33%)  |

316 Fitbit wear time on average met literature standards (70.5%, or 16.9 hours per day suggesting  
 317 an average of 10-15 hours during waketime)<sup>34</sup>. Cohort 1 participants stopped wearing the Fitbit with 2-4  
 318 weeks left in the program, so we instilled a biweekly check of wear-time and troubleshooting after which  
 319 this pattern did not repeat. Average steps for those with Fitbit step goals were 8274 (SD=3734) per day  
 320 and for the total sample were 7178 (SD=4013) per day.

Each skit successfully integrated 3-5 educational points (Table 6).

**Table 6.** Structure of topics, roles, and competencies taught during skits for each cohort.

| <b>Cohort</b> | <b>Topic</b>                          | <b>Roles<sup>1</sup></b>                                                                                                                                                                                                                                          | <b>Educational Points and How Integrated</b>                                                                                                                                                           |
|---------------|---------------------------------------|-------------------------------------------------------------------------------------------------------------------------------------------------------------------------------------------------------------------------------------------------------------------|--------------------------------------------------------------------------------------------------------------------------------------------------------------------------------------------------------|
| 1             | Team sports and type 1 diabetes (T1D) | -Athlete with newly diagnosed with T1D<br>-Teammate living with T1D for several years<br>-Continuous glucose monitor with alerts<br>-Coach                                                                                                                        | -Speaking to coaches who are not familiar with T1D management around MVPA<br>-Peer mentoring<br>-Competitive sports and glycemic management                                                            |
| 2 & 3         | Zombie Apocalypse                     | -Zombie<br>-Zombie-killing engineer<br>-Teen newly diagnosed with T1D and knows nothing about what they need for T1D management during an apocalypse<br>-Teen with longer duration of T1D<br>-Dr. Rescue<br>-News host<br>-Continuous glucose monitor with alerts | -Essential supplies for T1D<br>-Prioritizing aspects of T1D management<br>-Operating continuous glucose monitors<br>-Impact of MVPA on glycemic management<br>-Impact of stress on glycemic management |
| 4             | Wilderness Excursion                  | -Lilo (Hawaiian girl)<br>-Stitch (helpful alien)<br>-Evil singing crab<br>-Battler of evil singing crab<br>-Diabuddy (diabetes buddy)<br>-Angel<br>-Narrator                                                                                                      | -Same as Zombie Apocalypse                                                                                                                                                                             |

<sup>1</sup>Self-chosen by interested participants, remaining ones assigned.  
MVPA, moderate-to-vigorous physical activity

323 **Ancillary Analysis of Glycemic Outcomes**

324

325

326

327

328

329

330

331

Compared to baseline HbA1c, GMI during the intervention was moderately lower and HbA1c at maintenance follow-up was largely lower (Table 7). From baseline to maintenance follow-up, change in body mass index percentile was negligible (67±29 to 66±30 %ile, d = -0.10, 95% CI [-0.37, 0.17]) and in total daily insulin dose was small (0.88±0.27 to 0.83±0.24 U/kg, d = -0.35, 95% CI [-0.62, -0.07]). Seven participants upgraded their insulin device to a closed-loop system, but device upgrades did not drive HbA1c changes; i.e., the average HbA1c change among these 7 participants was the same as the full cohort.

**Table 7.** Glycemic outcomes (n=15)

|                   | Mean±SD (%) | Mean±SD (mmol/mol) | # of participants having decrease from baseline | # of participants having increase from baseline | # of participants missing*      | Effect size (d) vs baseline [95% CI] |
|-------------------|-------------|--------------------|-------------------------------------------------|-------------------------------------------------|---------------------------------|--------------------------------------|
| Baseline HbA1c †  | 8.9±2.2     | 74±24              | N/A                                             | N/A                                             | 0 missing HbA1c (6 missing CGM) | N/A                                  |
| Weeks 1-2 GMI     | 8.7±2.0     | 72±31              | 6                                               | 4                                               | 5 missing CGM                   | -0.35 [-0.62, -0.07]                 |
| Weeks 3-4 GMI     | 8.4±1.5     | 68±17              | 6                                               | 6                                               | 3 missing CGM                   | -0.45 [-0.73, -0.17]                 |
| Weeks 5-6 GMI     | 8.3±1.6     | 67±18              | 7                                               | 5                                               | 3 missing CGM                   | -0.72 [-1.01, -0.43]                 |
| Long-term HbA1c ‡ | 8.3±1.8     | 67±20              | 10                                              | 3                                               | 2 missing HbA1c                 | -1.12 [-0.81, -1.44]                 |

GMI, glucose management indicator which projects HbA1c based on continuous glucose monitor (CGM) data.

\*Missing values reflect partially complete CGM data (<70%) that was excluded from analysis and handled by intention-to-treat (last observation carried forward) for calculation of mean values and effect size. Every participant had at least one non-imputed value following baseline.

†Taken an average of 7 weeks (range 1-14) before intervention start

‡Taken an average of 45 weeks (range 19-77) after intervention start

332

333

**DISCUSSION**

334

335

336

337

338

Adolescents with T1D are vulnerable to inactivity, challenges with diabetes self-management, and social isolation. While many interventions have targeted this problem, the incorporation of peers and role models is in nascent stages<sup>26,36</sup> and mostly focused on T1D-specific behaviors rather than those important for general health such as MVPA. A major strength of the study was the enrollment of a diverse sample of adolescents in greatest need of support for MVPA and T1D self-management (lower

339 income, people of color, elevated HbA1c).<sup>37</sup> This study had no A1c upper limit, thus incorporating a  
340 group of youth with T1D at high risk of dysglycemia that has been largely excluded from research  
341 studies. Further supporting generalizability, instructors from a diversity of backgrounds were able to  
342 facilitate with similar competencies. Intervention attendance was excellent and overcame logistical  
343 barriers related to alignment of group schedules, availability of MVPA supplies, timing MVPA with  
344 insulin and diet, and provision of real-time guidance. Given the focus on feasible uptake of technology  
345 and inclusion of youth with all HbA1c levels, we enrolled participants even if they were not consistently  
346 wearing CGM at enrollment, which meant glycemic outcomes could only be assessed by combining  
347 HbA1c and GMI values in an ancillary analysis. HbA1c and GMI can be discordant due to the  
348 timeframe they reflect and non-glycemic factors that can impact HbA1c.<sup>31</sup> Nonetheless, glycemic  
349 reductions were seen during and after the intervention. These findings were encouraging, especially in  
350 light of the elevated HbA1c levels in the cohort at baseline, as these youth are largely excluded from  
351 research.

352 Prior studies supporting MVPA for adolescents with T1D provided self-management education  
353 and decision guidance<sup>32,38-40</sup> and only one included personal support, which came from key family  
354 members such as a parent.<sup>32</sup> In real-world contexts, 91% of adolescents with T1D report that their  
355 parents discourage MVPA.<sup>7</sup> Support from peers and peer mentors, however, was rated as important by  
356 adolescents with T1D<sup>41,42</sup> and associated with increased diabetes self-care.<sup>43</sup> Peer support for  
357 adolescents with T1D should be applied to MVPA and other general health metrics, whereas to date it  
358 has only been applied to T1D-specific behaviors.<sup>26-28,36</sup> Such restriction of peer support to T1D-specific  
359 behaviors has been negatively associated with diabetes self-care,<sup>43</sup> similar to the “nagging” perceived  
360 from parents.<sup>44</sup> It may also be less engaging, as these prior peer interventions have been almost  
361 entirely restricted to asynchronous communications without physical activities.<sup>27,28</sup> When synchronous  
362 chats have been added, just 39%-48% of participants attended one or more sessions.<sup>28,36</sup> Overall, the  
363 present study shows the promise of peer group MVPA as a novel strategy both for supporting MVPA  
364 and generally engaging adolescents with T1D.

365 The primary finding of the study was that the virtual, compared to our previous in-person  
366 protocol,<sup>24</sup> greatly increased feasibility while maintaining excellent safety standards. Compared to our  
367 in-person group, we doubled recruitment uptake proportion from 16% to 35%, which is comparable to  
368 37% seen in personalized MVPA prescription for T1D that did not require fitting a group schedule.<sup>32</sup> We  
369 also expanded from clinic to social media venues. In addition, we improved the attendance from 56% to  
370 85%-90%, while also doubling the frequency of sessions from once to twice per week. A glucose  
371 monitoring protocol was followed with no adverse events and occurrence of MVPA-induced  
372 hypoglycemia no more frequently than typical daily living. The program was also highly cost-efficient.  
373 Social media advertisements utilized community postings rather than paid advertisements, and virtual  
374 technology was all within the scope of devices normally owned by diverse families of teens with T1D.  
375 Videogame technology is popular among teens and substantially more so among those from lower-  
376 income families,<sup>45</sup> the smartwatch was the most economy-grade on the market (retail \$80 USD), and  
377 T1D was monitored by standard technology within the scope of the standard of care (CGM, fingerstick  
378 glucose and ketone meters).

379 The high acceptability of the in-person protocol<sup>25</sup> was also maintained based on mean  
380 satisfaction scores, though unbalanced across subscales. Intervention delivery competencies that could  
381 be directly delivered from young adult role model instructors – sharing T1D and MVPA knowledge and  
382 experiences and building T1D and MVPA self-management skills – achieved an excellent rating at  
383 68%-78% of sessions. By contrast, those that depended upon teen-to-teen interactions were achieved  
384 excellently much less often. Similarly, instructor interactions were the most highly rated and most  
385 important component of the program to teens. Perceived group cohesion was also rated highly by the  
386 teens, reflecting some combination of perceived cohesion to the instructors and other teens. Program  
387 structure and comfort were rated less highly than instructor interactions and perceived group cohesion,  
388 though nonetheless received ratings of 4+ out of 5 and were likely essential to the program's feasibility.

389 The technological aspects of the virtual MVPA experience received more modest ratings.  
390 Participants generally reported that the Ring Fit game functioned well in terms of clear goals, feedback,

391 and control. Concordantly, we observed that they achieved heart rate in the MVPA range as previously  
392 reported for other videogames that elicit full body movements and engage large muscle groups (i.e.,  
393 active videogames).<sup>19</sup> However, participants were more neutral about the components that reflect  
394 enjoyment of the game which include sensory experience, challenge, and difficulty. In summary, the  
395 advantages of our program were effectiveness at connecting teens to young adult role models in a way  
396 that was logistically feasible, time efficiency for the role models since they could interact with a group all  
397 at once, and sustainment of favorable MVPA and clinical metrics. The relative limitations were the  
398 capability to facilitate peer interactions and have an enjoyable MVPA experience. It may therefore be  
399 beneficial to integrate our curriculum into more immersive technology such as virtual reality headsets  
400 allowing interactions through avatars.

401 Guidelines for safe MVPA with T1D provide general rules for maintaining glycemic stabilization  
402 through the adjustment of factors like diet, insulin, and type of MVPA.<sup>3-5</sup> However, they presently lack  
403 adequate real-time support for their implementation. They acknowledge that they need a trial-and-error  
404 refinement process for each individual; the existing knowledge does not provide a one-size-fits-all  
405 approach nor can the needed refinements to it be accomplished within the scope of clinical  
406 appointments. Therefore, youth with T1D need to be given support during the time of MVPA in order to  
407 interpret and overcome the glycemic and psychosocial challenges that arise with the sometimes  
408 unpredictable glycemic responses to MVPA and the opportunity to build problem-solving skills “in the  
409 moment”.

410 Thus, there is a need for interventions that not only facilitate MVPA, but do so with a  
411 combination of behavior-change theory and practical considerations. First, from a practical standpoint,  
412 teens with T1D could benefit from regular interactions with their clinicians so they can ask questions  
413 about glycemic changes related to specific MVPA experiences, but most clinicians lack the time and  
414 resources to make this commitment. In the present study, the time efficiency of this process was  
415 quadrupled due to the group setting. Second, basic resources such as neighborhoods with safe play  
416 space are often inequitably accessed across socioeconomic groups.<sup>37</sup> In the present study, resources

417 were accessible by a diverse group of participants and socioeconomic levels. Third, advanced  
418 resources including peer support and role model mentoring are typically even less available than the  
419 basic guidance to teens with T1D due to the rarity of the condition, and guidance given in schools and  
420 through sports is not T1D-specific. Fourth, in our study, the activities and group process were driven by  
421 participants who could individually and collaboratively choose MVPA goals, giving them more flexibility  
422 and individualization than a prescribed curriculum.

423 The study had some limitations. First, it was a single-group study evaluating the feasibility and  
424 acceptability of the intervention with planned outcome metrics pertaining to safety and the most  
425 promising program components but not efficacy. Second, there are concerns about Fitbit heart rate  
426 measurements as two studies have reported they were less accurate for those with darker skin tone.<sup>46</sup>  
427 However, Fitbit was mainly used for step-counting which does not have this limitation, and heart rate  
428 was only used for an assessment of convergent validity with the validated videogame.<sup>19</sup> Third, while  
429 participants perceived high group cohesion, they had minimal verbal interactions with each other.  
430 Instructors were trained in group facilitation strategies derived from our expert planning group  
431 discussions and pilot sessions, but for future studies we will utilize an accredited group facilitation  
432 course. Peer interactions might also be enhanced by interoperable virtual reality technology that  
433 creates a more immersive experience. Finally, the study was limited to those who were able to afford  
434 Internet access at home, those who had television/computer screens, and time to attend the sessions.

## 435 **CONCLUSIONS**

436 Overall, we demonstrated the feasibility of facilitating a virtual network for MVPA, self-  
437 management education and guidance, diabetes-specific management skills, and peer and role model  
438 support for adolescents with T1D. We combined a fitness videogame, wearable step-tracking, a  
439 telehealth glucose safety monitoring protocol, diabetes self-management education, and skits designed  
440 to address diabetes-specific management skills. Successes included attraction of a diverse group, high  
441 attendance at the sessions, T1D self-management guidance that promoted safe MVPA, and meaningful  
442 connections to role-model instructors including shared experiences and skills in T1D self-management



443 and coping. The challenge was promoting immersive interaction among the adolescents. Therefore,  
444 future trials testing efficacy and moderators warrant upgrades of delivery to include more immersive  
445 virtual reality technologies, and financial investment to integrate and interoperate the components of  
446 our curriculum: MVPA, discussion, skits, viewership of glucose, and insulin dosing.

#### 447 **DATA AVAILABILITY**

448 The individual participant data, study protocol, statistical analysis plan, informed consent form,  
449 and analysis code used to support the findings of this study are available from the corresponding author  
450 upon request. The data will be shared with researchers who provide a methodologically sound proposal  
451 to achieve the aims of the approved proposal. To gain access, data requesters must sign a data access  
452 agreement which will be drafted by Yale University and include the data requester's proposal as an  
453 exhibit.

#### 454 **CONFLICTS OF INTEREST**

455 G.I.A. has in the last 3 years received grant support (to his institution) from the Patterson Trust,  
456 American Heart Association, National Institutes of Health, and Veterans Health Administration. He has  
457 also received professional services from Fitscript and Calm, on projects separate from the present  
458 study. S.N. receives grant support (to her institution) from the National Institutes of Health. C.T. is a  
459 consultant for Calm. M.S. is employed as a senior product manager by Abbott Laboratories and  
460 receives restricted stock units. S.A.W. currently receives grant support (to his institution) from Abbott  
461 Laboratories and the National Institutes of Health. In the last 3 years he has received honoraria for  
462 serving as a speaker for Abbott and Dexcom and as a consultant for Zealand Pharma. The Yale  
463 Children's Diabetes Center receives free CGM supplies through the Abbott Laboratories clinical sample  
464 program, which are distributed to patients including some who participated in this study. L.M.N.  
465 receives funding for research from the National Institutes of Health and Medtronic Diabetes. She is also  
466 a consultant for Medtronic, WebMD, and Calm. The authors attest that the Patterson Trust, American  
467 Heart Association, National Institutes of Health, Veterans Health Administration, Fitscript, Calm, Abbott  
468 Laboratories, Dexcom, Zealand Pharma, Medtronic, and WebMD had no influence on the design of this



469 study or its outcomes. The authors conducted the research outside of their responsibilities and  
470 affiliations with these entities.

#### 471 **FUNDING STATEMENT**

472 The study and G.I.A. were supported by American Heart Association Grant #852679 (G.I.A.,  
473 2021–2024) and a Robert E. Leet and Clara Guthrie Patterson Trust Mentored Research Award, Bank  
474 of America, N.A., Trustee. G.I.A. and L.M.N. were supported by the National Institute of Diabetes,  
475 Digestive, and Kidney Diseases of the National Institutes of Health under mentored research scientist  
476 development awards (K01DK129441, K23DK128560). The study was further supported by the National  
477 Institutes of Health under the Yale Diabetes Research Center (P30DK045735). None of these entities  
478 were involved in the manuscript writing, editing, approval, or decision to publish.

#### 479 **ACKNOWLEDGMENTS**

480 The authors thank the families and participants that help made this research possible. We also  
481 acknowledge Sa’Ra Skipper and Juanita Montoya for their assistance with conducting the study. Study  
482 data were collected and managed using REDCap electronic data capture tools hosted at Yale  
483 University.

#### 484 **AUTHORSHIP CONFIRMATION/CONTRIBUTION STATEMENT**

485 **GIA:** Conceptualization (lead), data curation (lead), formal analysis (lead), funding acquisition (lead),  
486 investigation (equal), methodology (equal), project administration (lead), resources (lead), software  
487 (support), supervision (lead), validation (equal), visualization (lead), writing – original draft (lead). **SN:**  
488 Conceptualization (equal); investigation (equal); methodology (equal); writing – review and editing  
489 (equal). **MSK:** Methodology (supporting); Writing – review and editing (equal). **ADH:** Investigation  
490 (equal); methodology (equal); project administration (equal); software (equal); writing, review, and  
491 editing (supporting). **CT:** Investigation (equal); methodology (equal); writing, review, and editing (equal).  
492 **AC:** Investigation (equal); methodology (equal); writing – review and editing (equal). **MS:** Investigation  
493 (equal); methodology (equal); writing, review, and editing (equal). **JSB:** Methodology (supporting);  
494 Writing – review and editing (equal). **SAW:** Conceptualization (equal); investigation (equal);

495 methodology (equal); writing – review and editing (equal); writing – review and editing (equal). **LMN:**  
496 Conceptualization (equal), formal analysis (equal), investigation (equal), methodology (lead), software  
497 (lead), visualization (equal), writing – review and editing (lead).

498

499

## REFERENCES

500

- 501 1. Foster NC, Beck RW, Miller KM, et al. State of Type 1 Diabetes Management and Outcomes  
502 from the T1D Exchange in 2016-2018. *Diabetes technology & therapeutics*. 2019;21(2):66-72.
- 503 2. Nathan DM, Group DER. The diabetes control and complications trial/epidemiology of diabetes  
504 interventions and complications study at 30 years: overview. *Diabetes care*. 2014;37(1):9-16.
- 505 3. Adolfsson P, Taplin CE, Zaharieva DP, et al. ISPAD Clinical Practice Consensus Guidelines  
506 2022: Exercise in children and adolescents with diabetes. *Pediatr Diabetes*. 2022;23(8):1341-  
507 1372.
- 508 4. Moser O, Riddell MC, Eckstein ML, et al. Glucose management for exercise using continuous  
509 glucose monitoring (CGM) and intermittently scanned CGM (isCGM) systems in type 1  
510 diabetes: position statement of the European Association for the Study of Diabetes (EASD) and  
511 of the International Society for Pediatric and Adolescent Diabetes (ISPAD) endorsed by JDRF  
512 and supported by the American Diabetes Association (ADA). *Pediatric diabetes*.  
513 2020;21(8):1375-1393.
- 514 5. Riddell MC, Gallen IW, Smart CE, et al. Exercise management in type 1 diabetes: a consensus  
515 statement. *The lancet Diabetes & endocrinology*. 2017;5(5):377-390.
- 516 6. Amiel SA, Sherwin RS, Simonson DC, Lauritano AA, Tamborlane WV. Impaired insulin action in  
517 puberty. A contributing factor to poor glycemic control in adolescents with diabetes. *The New  
518 England journal of medicine*. 1986;315(4):215-219.
- 519 7. Jabbour G, Henderson M, Mathieu ME. Barriers to Active Lifestyles in Children with Type 1  
520 Diabetes. *Canadian journal of diabetes*. 2016;40(2):170-172.
- 521 8. Ryninks K, Sutton E, Thomas E, Jago R, Shield JP, Burren CP. Attitudes to Exercise and  
522 Diabetes in Young People with Type 1 Diabetes Mellitus: A Qualitative Analysis. *PLoS one*.  
523 2015;10(10):e0137562.
- 524 9. Elmesmari R, Reilly JJ, Martin A, Paton JY. Accelerometer measured levels of moderate-to-  
525 vigorous intensity physical activity and sedentary time in children and adolescents with chronic  
526 disease: A systematic review and meta-analysis. *PLoS one*. 2017;12(6):e0179429.
- 527 10. Tapia-Serrano MA, Sevil-Serrano J, Sanchez-Miguel PA, Lopez-Gil JF, Tremblay MS, Garcia-  
528 Hermoso A. Prevalence of meeting 24-Hour Movement Guidelines from pre-school to  
529 adolescence: A systematic review and meta-analysis including 387,437 participants and 23  
530 countries. *J Sport Health Sci*. 2022;11(4):427-437.
- 531 11. Chinchilla P, Dovic K, Braune K, et al. Perceived Knowledge and Confidence for Providing  
532 Youth-Specific Type 1 Diabetes Exercise Recommendations amongst Pediatric Diabetes  
533 Healthcare Professionals: An International, Cross-Sectional, Online Survey. *Pediatric Diabetes*.  
534 2023;2023:8462291.
- 535 12. Benzing V, Schmidt M. Exergaming for Children and Adolescents: Strengths, Weaknesses,  
536 Opportunities and Threats. *Journal of clinical medicine*. 2018;7(11):422. doi:  
537 410.3390/jcm7110422.
- 538 13. Council On C, Media. Media Use in School-Aged Children and Adolescents. *Pediatrics*.  
539 2016;138(5).
- 540 14. Akhter K, Turnbull T, Simmons D. A systematic review of parent/peer-based group interventions  
541 for adolescents with type 1 diabetes: interventions based on theoretical/therapeutic frameworks.

- 542 *Br J Diabetes*. 2018;18:51-65.
- 543 15. Prochaska JJ, Sallis JF, Long B. A physical activity screening measure for use with adolescents  
544 in primary care. *Archives of Pediatrics & Adolescent Medicine*. 2001;155(5):554-559.
- 545 16. Warburton DE, Gledhill N, Jamnik VK, et al. Evidence-based risk assessment and  
546 recommendations for physical activity clearance: Consensus Document 2011. *Applied  
547 physiology, nutrition, and metabolism = Physiologie appliquee, nutrition et metabolisme*.  
548 2011;36 Suppl 1:S266-298.
- 549 17. Currie C IJ, Molcho M, Lenzi M, Veselska Z & Wild F ed *Health Behaviour in School-aged  
550 Children (HBSC) Study Protocol: Background, Methodology and Mandatory items for the  
551 2013/14 Survey*. St Andrew: CAHRU.
- 552 18. Petersen AC, Crockett L, Richards M, Boxer A. A self-report measure of pubertal status:  
553 Reliability, validity, and initial norms. *Journal of youth and adolescence*. 1988;17(2):117-133.
- 554 19. Comeras-Chueca C, Villalba-Heredia L, Pérez-Llera M, et al. Assessment of Active Video  
555 Games' Energy Expenditure in Children with Overweight and Obesity and Differences by  
556 Gender. *International journal of environmental research and public health*. 2020;17(18):6714.  
557 doi: 6710.3390/ijerph17186714.
- 558 20. Fuller D, Colwell E, Low J, et al. Reliability and Validity of Commercially Available Wearable  
559 Devices for Measuring Steps, Energy Expenditure, and Heart Rate: Systematic Review. *JMIR  
560 mHealth and uHealth*. 2020;8(9):e18694.
- 561 21. Allen NA. Social cognitive theory in diabetes exercise research: an integrative literature review.  
562 *The Diabetes educator*. 2004;30(5):805-819.
- 563 22. Adolfsson P, Riddell MC, Taplin CE, et al. ISPAD Clinical Practice Consensus Guidelines 2018:  
564 Exercise in children and adolescents with diabetes. *Pediatric diabetes*. 2018;19 Suppl 27:205-  
565 226.
- 566 23. Staiano AE, Abraham AA, Calvert SL. Motivating effects of cooperative exergame play for  
567 overweight and obese adolescents. *Journal of diabetes science and technology*. 2012;6(4):812-  
568 819.
- 569 24. Ash GI, Joiner KL, Savoye M, et al. Feasibility and safety of a group physical activity program  
570 for youth with type 1 diabetes. *Pediatric diabetes*. 2019.
- 571 25. DeJonckheere M, Joiner KL, Ash GI, et al. Youth and Parent Perspectives on the Acceptability  
572 of a Group Physical Activity and Coping Intervention for Adolescents With Type 1 Diabetes. *Sci  
573 Diabetes Self Manag Care*. 2021;47(5):367-381.
- 574 26. Titoria R, Amed S, Tang TS. Peer Support Interventions on Digital Platforms for Children With  
575 Type 1 Diabetes and Their Caregivers. *Diabetes Spectr*. 2022;35(1):26-32.
- 576 27. Walker AF, Haller MJ, Gurka MJ, et al. Addressing health disparities in type 1 diabetes through  
577 peer mentorship. *Pediatr Diabetes*. 2020;21(1):120-127.
- 578 28. Troncione A, Cascella C, Chianese A, et al. Psychological support for adolescents with type 1  
579 diabetes provided by adolescents with type 1 diabetes: The chat line experience. *Pediatric  
580 diabetes*. 2019;20(6):800-810.
- 581 29. Staiano AE, Adams MA, Norman GJ. Motivation for Exergame Play Inventory: Construct validity  
582 and relationship to game play. *Cyberpsychology: Journal of Psychosocial Research on  
583 Cyberspace*. 2019;13(3):Article 7.
- 584 30. Chin WW, Salisbury WD, Pearson AW, Stollak MJ. Perceived Cohesion in Small Groups:  
585 Adapting and Testing the Perceived Cohesion Scale in a Small-Group Setting. *Small Group  
586 Research*. 1999;30(6):751-766.
- 587 31. Piona C, Marigliano M, Mozzillo E, et al. Evaluation of HbA1c and glucose management  
588 indicator discordance in a population of children and adolescents with type 1 diabetes. *Pediatr  
589 Diabetes*. 2022;23(1):84-89.
- 590 32. Faulkner MS, Michaliszyn SF, Hepworth JT, Wheeler MD. Personalized exercise for  
591 adolescents with diabetes or obesity. *Biological research for nursing*. 2014;16(1):46-54.
- 592 33. Quirk H, Blake H, Tennyson R, Randell TL, Glazebrook C. Physical activity interventions in

- 593 children and young people with Type 1 diabetes mellitus: a systematic review with meta-  
594 analysis. *Diabetic medicine : a journal of the British Diabetic Association*. 2014;31(10):1163-  
595 1173.
- 596 34. Troiano RP, Berrigan D, Dodd KW, Masse LC, Tilert T, McDowell M. Physical activity in the  
597 United States measured by accelerometer. *Medicine and science in sports and exercise*.  
598 2008;40(1):181-188.
- 599 35. Fritz CO, Morris PE, Richler JJ. Effect size estimates: current use, calculations, and  
600 interpretation. *J Exp Psychol Gen*. 2012;141(1):2-18.
- 601 36. Bisno DI, Reid MW, Pyatak EA, et al. Virtual Peer Groups Reduce HbA1c and Increase  
602 Continuous Glucose Monitor Use in Adolescents and Young Adults with Type 1 Diabetes.  
603 *Diabetes Technol Ther*. 2023;25(9):589-601.
- 604 37. Armstrong S, Wong CA, Perrin E, Page S, Sibley L, Skinner A. Association of Physical Activity  
605 With Income, Race/Ethnicity, and Sex Among Adolescents and Young Adults in the United  
606 States: Findings From the National Health and Nutrition Examination Survey, 2007-2016. *JAMA*  
607 *pediatrics*. 2018.
- 608 38. Wong CH, Chiang YC, Wai JP, et al. Effects of a home-based aerobic exercise programme in  
609 children with type 1 diabetes mellitus. *Journal of Clinical Nursing*. 2011;20(5-6):681-691.
- 610 39. Marrero DG, Fremion AS, Golden MP. Improving compliance with exercise in adolescents with  
611 insulin-dependent diabetes mellitus: results of a self-motivated home exercise program.  
612 *Pediatrics*. 1988;81(4):519-525.
- 613 40. Shetty VB, Soon WHK, Roberts AG, et al. A Novel Mobile Health App to Educate and Empower  
614 Young People With Type 1 Diabetes to Exercise Safely: Prospective Single-Arm Mixed Methods  
615 Pilot Study. *JMIR Diabetes*. 2021;6(4):e29739.
- 616 41. Ye CY, Jeppson TC, Kleinmaus EM, Kliems HM, Schopp JM, Cox ED. Outcomes That Matter to  
617 Teens With Type 1 Diabetes. *The Diabetes educator*. 2017;43(3):251-259.
- 618 42. Xie LF, Housni A, Nakhla M, et al. Adaptation of an Adult Web Application for Type 1 Diabetes  
619 Self-management to Youth Using the Behavior Change Wheel to Tailor the Needs of Health  
620 Care Transition: Qualitative Interview Study. *JMIR Diabetes*. 2023;8:e42564.
- 621 43. Doe E. An analysis of the relationships between peer support and diabetes outcomes in  
622 adolescents with type 1 diabetes. *J Health Psychol*. 2018;23(10):1356-1366.
- 623 44. Luyckx K, Seiffge-Krenke I, Missotten L, Rassart J, Casteels K, Goethals E. Parent-adolescent  
624 conflict, treatment adherence and glycemic control in Type 1 diabetes: the importance of  
625 adolescent externalising symptoms. *Psychol Health*. 2013;28(9):1082-1097.
- 626 45. Priceonomics Data S. Gender, Income & Education: Who Plays Video Games? In. Vol  
627 20212018.
- 628 46. Koerber D, Khan S, Shamsheri T, Kirubarajan A, Mehta S. Accuracy of Heart Rate  
629 Measurement with Wrist-Worn Wearable Devices in Various Skin Tones: a Systematic Review.  
630 *J Racial Ethn Health Disparities*. 2022:1-9.  
631
